# Supplementary material for: Associations between dietary patterns and serum uric acid concentrations in children and adolescents: a cross-sectional study
Source: Royal Society of Chemistry journal article supplement (doi:10.1039/d3fo03043a), 2023-01-01
Supplement: d3fo03043a1.pdf [file d3fo03043a1.pdf]

## **Associations between dietary patterns and serum uric acid concentrations in children and adolescents: a cross-sectional study**

### Supplementary Material

#### Supplementary Figures (3)

ESI Fig. 1. Flow chart of participants exclusion

ESI Fig. 2. Median serum uric acid and prevalence of hyperuricemia in children and adolescents of different sex and age

ESI Fig. 3. The restricted cubic splines in different age and pubertal status subgroups

#### Supplementary Tables (9)

ESI Table 1. Food items and food groups utilized in the dietary pattern analyses

ESI Table 2. Baseline characteristics of the study population according to quintile of six major dietary patterns' score (n=3,383)

ESI Table 3. Association between six major dietary patterns and high serum uric acid concentrations in the EMSNGS study (n=3,383)

ESI Table 4. Association between meat-based diet, food compositions and serum uric acid concentrations in the EMSNGS study (n=3,383)

ESI Table 5. Factor-Matrix loadings for the five major dietary patterns identified by principal component analysis using varimax rotation after removing high hypoxanthine food groups

ESI Table 6. The association between five dietary patterns without hypoxanthine-rich food groups and serum uric acid concentrations in the EMSNGS study (n=3,383)

ESI Table 7. The Pearson correlation coefficient between the scores of dietary pattern 5 (without hypoxanthine-rich food groups) and the scores of six dietary patterns (with all food groups)

ESI Table 8. Sensitivity analysis of the association between the z-scores of serum uric acid and meat-based diet in the EMSNGS study (n=3,383)

ESI Table 9. Sensitivity analysis of the association between serum uric acid and meat-based diet after excluding participants with missing covariates in the EMSNGS study (n=3,302)

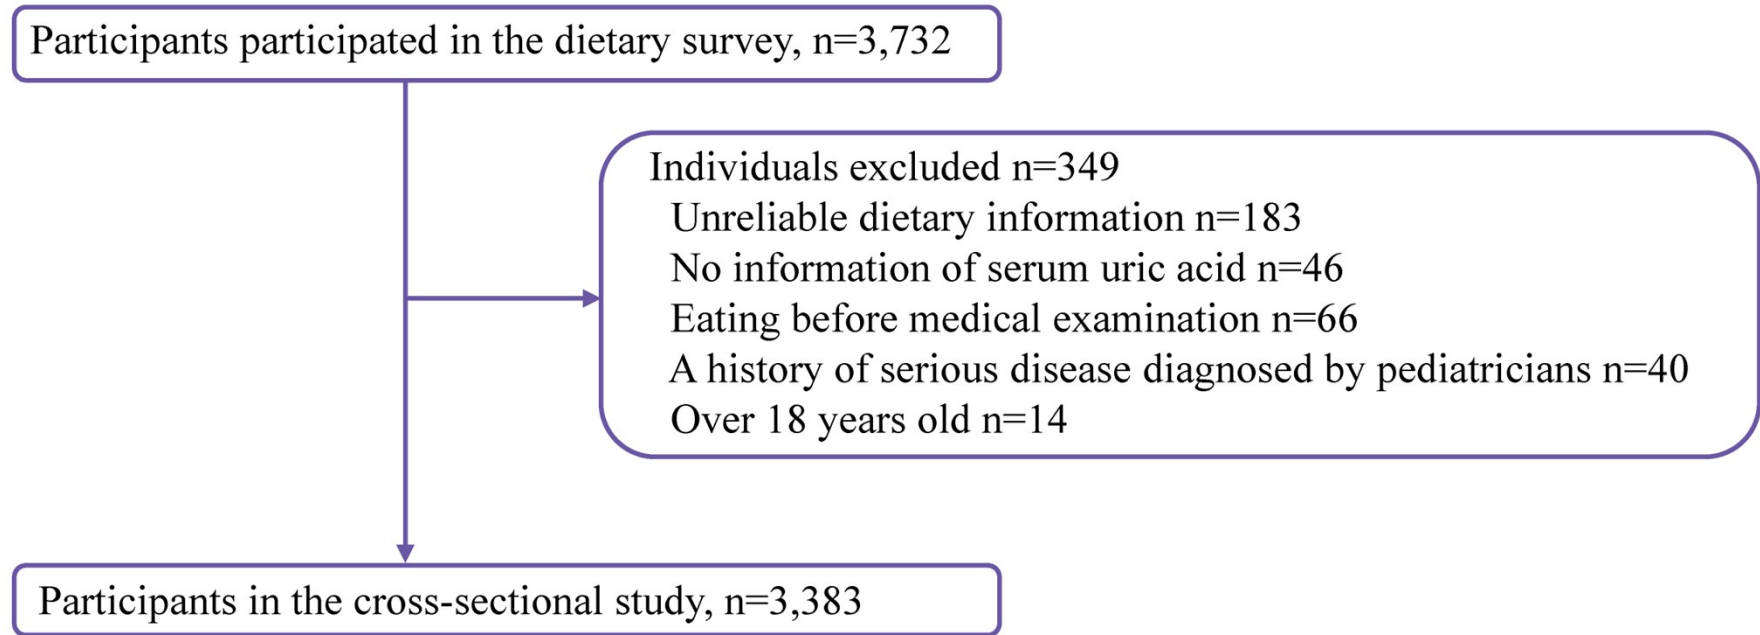

ESI Fig. 1. Flow chart of participants exclusion

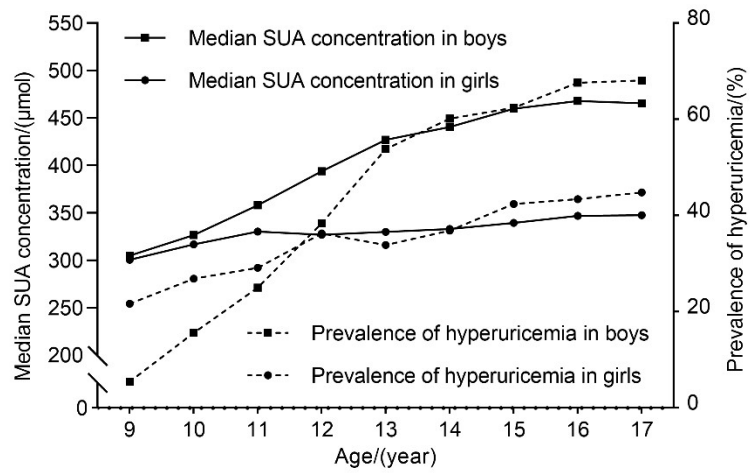

ESI Fig. 2. Median serum uric acid and prevalence of hyperuricemia in children and adolescents of different sex and age  
SUA, serum uric acid.

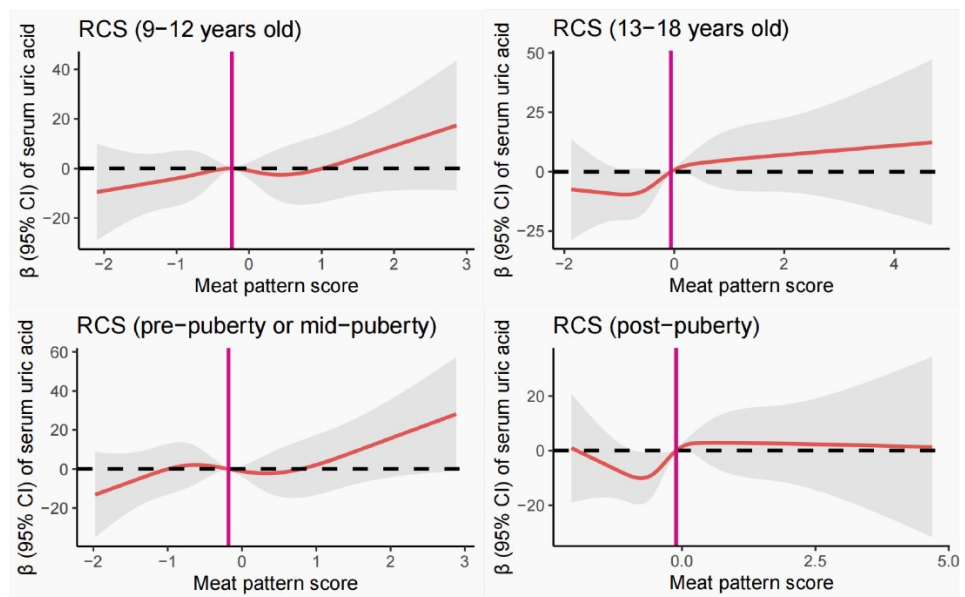

ESI Fig. 3. The restricted cubic splines in different age and pubertal status subgroups  
RCS, restricted cubic splines; CI, confidence interval.

ESI Table 1. Food items and food groups utilized in the dietary pattern analyses

| Food groups               | Food Items                                                                                                                                                                                                                                                                                                                                                                                                        |
|---------------------------|-------------------------------------------------------------------------------------------------------------------------------------------------------------------------------------------------------------------------------------------------------------------------------------------------------------------------------------------------------------------------------------------------------------------|
| Fried food                | Fried food (churros, fritters, fried cakes, etc.), instant noodles                                                                                                                                                                                                                                                                                                                                                |
| Drinks                    | No sugar drinks, pure fruit and vegetable juice (including freshly squeezed), fruit and vegetable drinks, carbonated drinks (Cola, Sprite, Fenda, soda, etc.), tea drinks, lactic acid bacteria drinks, flavored milk drinks, vegetable protein drinks, whole grain drinks, energy drinks (Monster, Red Bull, Baomine Water, etc.), coffee (Brewed, bottled, freshly ground), freshly made milk tea and fruit tea |
| Snack foods               | Puffed food (potato chips, shrimp, rice crust, etc.), pastries, dried beef/fish/squid silk, candied fruit, chocolate, candy, and ice cream                                                                                                                                                                                                                                                                        |
| Processed meat            | Processed meat                                                                                                                                                                                                                                                                                                                                                                                                    |
| Nut                       | Almonds, pecans, pistachios, walnuts, Brazil nuts etc.                                                                                                                                                                                                                                                                                                                                                            |
| Dairy                     | Milk, yogurt, milk powder, cream, cheese, other dairy                                                                                                                                                                                                                                                                                                                                                             |
| Fruits                    | Fresh fruits or dried fruits                                                                                                                                                                                                                                                                                                                                                                                      |
| Whole grains and pulses   | Whole grains (brown rice, millet, corn, etc.) or pulses (mung beans, red beans, flower beans, etc.)                                                                                                                                                                                                                                                                                                               |
| Red meats                 | Red meat                                                                                                                                                                                                                                                                                                                                                                                                          |
| Poultry                   | Poultry                                                                                                                                                                                                                                                                                                                                                                                                           |
| Refined grain             | Rice (rice, rice vermicelli, rice noodles, etc.), flour (steamed buns, noodles, etc.), bread                                                                                                                                                                                                                                                                                                                      |
| Soup                      | Chicken soup, ribs soup, bone broth, tomato soup, nori soup, mushroom soup, etc.                                                                                                                                                                                                                                                                                                                                  |
| Fish and other seafood    | fish, shrimp, lobster, scallops, squid and other aquatic products                                                                                                                                                                                                                                                                                                                                                 |
| Eggs                      | Fresh eggs (chicken eggs, duck eggs, goose eggs, quail eggs, etc.), salted eggs (salted duck eggs, salted chicken eggs/, salted goose eggs, etc.), preserved Eggs                                                                                                                                                                                                                                                 |
| Tubers                    | Potatoes, sweet potatoes, purple potatoes, yams, etc.                                                                                                                                                                                                                                                                                                                                                             |
| Vegetable                 | Dark-colored fresh vegetables or light-colored fresh vegetable                                                                                                                                                                                                                                                                                                                                                    |
| Soybeans and soy products | Soybeans (soybeans, green beans, black beans, etc.), soy milk/tofu brain, tofu and other soy products                                                                                                                                                                                                                                                                                                             |
| Mushrooms                 | Fresh mushrooms or dried mushrooms                                                                                                                                                                                                                                                                                                                                                                                |

Animal  
organs and blood

Animal blood, organs of animals (liver, heart, intestines, kidneys, etc.)

---





|                                             |                         |                         |                         |        |                         |                         |                         |        |                         |                         |                         |        |
|---------------------------------------------|-------------------------|-------------------------|-------------------------|--------|-------------------------|-------------------------|-------------------------|--------|-------------------------|-------------------------|-------------------------|--------|
| Hyperlipidemia (%)                          | 136 (20.1)              | 124 (18.3)              | 106 (15.7)              | 0.14   | 106 (15.7)              | 139 (20.5)              | 130 (19.2)              | 0.16   | 129 (19.1)              | 138 (20.4)              | 114 (16.9)              | 0.53   |
| Prehypertension or hypertension (%)         | 268 (39.6)              | 238 (35.2)              | 219 (32.4)              | 0.07   | 229 (33.9)              | 226 (33.4)              | 275 (40.7)              | 0.001  | 248 (36.7)              | 213 (31.5)              | 253 (37.4)              | 0.15   |
| Impaired fasting glucose (%)                | 117 (17.3)              | 117 (17.3)              | 119 (17.6)              | 0.25   | 112 (16.6)              | 86 (12.7)               | 135 (20.0)              | 0.005  | 134 (19.8)              | 100 (14.8)              | 107 (15.8)              | 0.09   |
| Puberty status (%)                          |                         |                         |                         | 0.02   |                         |                         |                         | 0.02   |                         |                         |                         | 0.67   |
| Pre-puberty                                 | 76 (11.2)               | 65 (9.6)                | 63 (9.3)                |        | 55 (8.1)                | 75 (11.1)               | 79 (11.7)               |        | 67 (9.9)                | 67 (9.9)                | 62 (9.2)                |        |
| Mid-puberty                                 | 154 (22.8)              | 192 (28.4)              | 204 (30.2)              |        | 156 (23.1)              | 198 (29.2)              | 183 (27.1)              |        | 197 (29.1)              | 178 (26.3)              | 185 (27.4)              |        |
| Post-puberty                                | 446 (66.0)              | 420 (62.0)              | 409 (60.5)              |        | 465 (68.8)              | 404 (59.7)              | 414 (61.2)              |        | 412 (60.9)              | 432 (63.8)              | 429 (63.5)              |        |
| physical activity (%)                       |                         |                         |                         | 0.01   |                         |                         |                         | <0.001 |                         |                         |                         | 0.04   |
| <0.5 h/day                                  | 191 (28.4)              | 160 (23.8)              | 144 (21.5)              |        | 172 (25.7)              | 166 (24.6)              | 132 (19.5)              |        | 130 (19.3)              | 176 (26.2)              | 164 (24.4)              |        |
| 0.5-1 h/day                                 | 290 (43.1)              | 312 (46.4)              | 304 (45.3)              |        | 308 (46.0)              | 327 (48.4)              | 294 (43.5)              |        | 316 (46.9)              | 302 (44.9)              | 294 (43.7)              |        |
| ≥0.5 h/day                                  | 192 (28.5)              | 201 (29.9)              | 223 (33.2)              |        | 190 (28.4)              | 183 (27.1)              | 250 (37.0)              |        | 228 (33.8)              | 195 (29.0)              | 215 (31.9)              |        |
| Family income (%)                           |                         |                         |                         | 0.01   |                         |                         |                         | 0.21   |                         |                         |                         | 0.009  |
| <120,000 CNY†                               | 226 (33.9)              | 195 (29.1)              | 166 (25.0)              |        | 184 (27.5)              | 193 (29.0)              | 177 (26.6)              |        | 177 (26.6)              | 221 (33.5)              | 197 (29.5)              |        |
| 120,000-250,000 CNY                         | 230 (34.5)              | 218 (32.5)              | 247 (37.2)              |        | 223 (33.3)              | 228 (34.3)              | 226 (33.9)              |        | 209 (31.4)              | 225 (34.1)              | 239 (35.8)              |        |
| ≥250,000 CNY                                | 211 (31.6)              | 257 (38.4)              | 251 (37.8)              |        | 263 (39.3)              | 244 (36.7)              | 263 (39.5)              |        | 279 (42.0)              | 214 (32.4)              | 232 (34.7)              |        |
| Maternal degree (%)                         |                         |                         |                         | 0.81   |                         |                         |                         | 0.37   |                         |                         |                         | 0.07   |
| ≤ Partial secondary school                  | 160 (23.9)              | 141 (21.1)              | 135 (20.2)              |        | 151 (22.6)              | 143 (21.5)              | 133 (19.9)              |        | 127 (19.1)              | 156 (23.4)              | 158 (23.7)              |        |
| High school diploma                         | 189 (28.2)              | 196 (29.4)              | 190 (28.4)              |        | 187 (28.0)              | 171 (25.7)              | 208 (31.1)              |        | 179 (26.9)              | 196 (29.3)              | 176 (26.4)              |        |
| ≥ College degree                            | 321 (47.9)              | 330 (49.5)              | 343 (51.3)              |        | 331 (49.5)              | 351 (52.8)              | 327 (49.0)              |        | 359 (54.0)              | 316 (47.3)              | 332 (49.8)              |        |
| Family history of hyperuricemia or gout (%) | 26 (3.9)                | 15 (2.2)                | 13 (1.9)                | 0.06   | 14 (2.1)                | 30 (4.5)                | 24 (3.6)                | 0.12   | 23 (3.4)                | 23 (3.4)                | 14 (2.1)                | 0.32   |
| Daily intake                                |                         |                         |                         |        |                         |                         |                         |        |                         |                         |                         |        |
| Energy (kcal/day)                           | 2209.4 [1795.8, 2681.2] | 2012.7 [1677.2, 2496.2] | 2539.7 [2051.0, 2997.4] | <0.001 | 1800.2 [1503.9, 2268.8] | 2043.2 [1746.1, 2473.7] | 2787.6 [2358.0, 3308.6] | <0.001 | 2364.8 [1953.5, 2886.4] | 1894.9 [1616.0, 2419.3] | 2455.3 [1975.2, 2942.5] | <0.001 |
| Total protein (g/day)                       | 77.3 [61.9, 99.7]       | 76.0 [62.6, 97.6]       | 105.5 [83.8, 130.9]     | <0.001 | 72.6 [56.8, 98.2]       | 78.3 [62.2, 97.9]       | 105.7 [84.0, 128.8]     | <0.001 | 95.0 [74.4, 117.6]      | 72.2 [57.8, 92.7]       | 95.3 [73.6, 119.0]      | <0.001 |
| Total fat (g/day)                           | 68.0 [51.1, 91.1]       | 71.1 [54.4, 93.4]       | 101.8 [78.4, 127.6]     | <0.001 | 70.7 [52.0, 97.5]       | 71.2 [53.8, 92.6]       | 96.1 [72.0, 120.7]      | <0.001 | 83.9 [64.4, 110.5]      | 65.4 [49.6, 86.8]       | 92.3 [70.0, 119.0]      | <0.001 |
| Total carbohydrate (g/day)                  | 316.3 [258.3, 386.1]    | 269.9 [221.2, 328.6]    | 295.4 [242.9, 354.9]    | <0.001 | 224.1 [192.6, 265.6]    | 280.6 [242.2, 324.3]    | 376.7 [319.7, 452.3]    | <0.001 | 304.6 [252.5, 379.2]    | 262.3 [218.4, 328.0]    | 308.6 [250.7, 370.6]    | <0.001 |
| Total dietary fiber (g/day)                 | 6.8 [4.9, 10.1]         | 6.9 [4.9, 9.7]          | 9.3 [6.4, 13.3]         | <0.001 | 5.5 [3.8, 8.5]          | 6.8 [5.0, 9.4]          | 10.3 [7.8, 14.3]        | <0.001 | 6.5 [4.7, 9.7]          | 6.6 [4.8, 9.2]          | 10.7 [7.5, 14.9]        | <0.001 |
| Total cholesterol (g/day)                   | 269.9 [188.0, 385.9]    | 407.2 [302.1, 516.1]    | 630.0 [485.3, 842.2]    | <0.001 | 357.9 [244.5, 528.5]    | 412.3 [269.4, 555.2]    | 496.6 [347.1, 693.8]    | <0.001 | 490.9 [345.4, 664.4]    | 348.8 [234.9, 502.7]    | 453.0 [302.4, 629.8]    | <0.001 |
| Total purine (mg/day)                       | 454.5 [355.2, 595.2]    | 507.4 [408.0, 650.4]    | 798.7 [644.4, 1004.0]   | <0.001 | 507.7 [380.5, 705.9]    | 513.9 [399.5, 666.1]    | 691.7 [536.7, 876.3]    | <0.001 | 566.9 [429.1, 731.5]    | 491.5 [384.8, 636.7]    | 707.7 [527.4, 887.0]    | <0.001 |
| Guanine (mg/day)                            | 149.7 [119.2, 189.5]    | 158.6 [128.4, 195.2]    | 232.4 [189.9, 286.7]    | <0.001 | 142.1 [111.3, 189.3]    | 159.9 [131.3, 194.6]    | 225.3 [182.9, 277.7]    | <0.001 | 171.3 [136.2, 223.6]    | 153.6 [121.2, 193.0]    | 214.3 [166.3, 266.4]    | <0.001 |
| Adenine (mg/day)                            | 148.1 [116.4, 184.3]    | 156.6 [127.3, 191.5]    | 231.7 [187.5, 288.5]    | <0.001 | 144.8 [110.4, 187.6]    | 158.5 [128.1, 195.0]    | 220.6 [178.0, 277.6]    | <0.001 | 168.9 [133.8, 221.8]    | 151.3 [120.3, 189.4]    | 213.4 [165.1, 269.0]    | <0.001 |
| Hypoxanthine (mg/day)                       | 123.7 [83.2, 183.5]     | 160.3 [106.8, 225.2]    | 276.8 [204.2, 373.1]    | <0.001 | 189.8 [127.6, 285.3]    | 161.5 [107.2, 236.2]    | 186.5 [124.1, 264.0]    | <0.001 | 180.1 [112.9, 260.5]    | 154.8 [103.7, 219.7]    | 217.1 [148.2, 302.1]    | <0.001 |
| Xanthine (mg/day)                           | 30.5 [23.4, 40.2]       | 32.9 [26.0, 42.7]       | 47.5 [37.0, 60.2]       | <0.001 | 28.9 [22.2, 38.0]       | 33.7 [26.0, 42.8]       | 47.1 [36.2, 59.5]       | <0.001 | 33.7 [26.3, 44.1]       | 31.7 [24.6, 40.6]       | 45.5 [35.5, 58.8]       | <0.001 |

CNY, China Yuan; SUA, serum uric acid.

Values are reported as No. (%), means (SD), or medians [Q1, Q3]. \*ANOVA, chi-square or Kruskal-Wallis tests where appropriate.

†1 CNY ≈ 0.14 US dollars.

ESI Table 3. Association between six major dietary patterns and high serum uric acid concentrations in the EMSNGS study (n=3,383).

|                                                 | Quintile of dietary pattern score |          |                   |          |                   |          |                   |          |                   |          | <i>p</i> for trend | per SD increased dietary pattern scores |          |
|-------------------------------------------------|-----------------------------------|----------|-------------------|----------|-------------------|----------|-------------------|----------|-------------------|----------|--------------------|-----------------------------------------|----------|
|                                                 | Q1                                |          | Q2                |          | Q3                |          | Q4                |          | Q5                |          |                    | OR (95% CI)                             | <i>P</i> |
|                                                 | OR (95% CI)                       | <i>P</i> | OR (95% CI)       | <i>P</i> | OR (95% CI)       | <i>P</i> | OR (95% CI)       | <i>P</i> | OR (95% CI)       | <i>P</i> |                    |                                         |          |
| Dietary pattern 1: ultra-processed diet         |                                   |          |                   |          |                   |          |                   |          |                   |          |                    |                                         |          |
| model 1                                         | Ref.                              | -        | 0.75 (0.58, 0.96) | 0.02     | 0.84 (0.65, 1.07) | 0.16     | 0.92 (0.72, 1.17) | 0.48     | 0.98 (0.76, 1.25) | 0.84     | 0.48               | 1.04 (0.96, 1.12)                       | 0.34     |
| model 2                                         | Ref.                              | -        | 0.77 (0.59, 1.01) | 0.06     | 0.89 (0.68, 1.16) | 0.38     | 0.99 (0.76, 1.29) | 0.94     | 0.98 (0.75, 1.28) | 0.88     | 0.54               | 1.03 (0.94, 1.12)                       | 0.57     |
| model 3                                         | Ref.                              | -        | 0.79 (0.60, 1.03) | 0.09     | 0.94 (0.72, 1.23) | 0.66     | 1.04 (0.80, 1.37) | 0.75     | 1.08 (0.81, 1.45) | 0.59     | 0.19               | 1.07 (0.97, 1.18)                       | 0.17     |
| Dietary pattern 2: plant-based nutritious diet  |                                   |          |                   |          |                   |          |                   |          |                   |          |                    |                                         |          |
| model 1                                         | Ref.                              | -        | 0.80 (0.62, 1.02) | 0.07     | 0.78 (0.61, 1.00) | 0.05     | 0.87 (0.68, 1.12) | 0.28     | 0.91 (0.71, 1.16) | 0.45     | 0.88               | 1.02 (0.95, 1.11)                       | 0.58     |
| model 2                                         | Ref.                              | -        | 0.86 (0.66, 1.12) | 0.26     | 0.78 (0.60, 1.02) | 0.07     | 0.88 (0.68, 1.15) | 0.36     | 0.91 (0.69, 1.20) | 0.48     | 0.67               | 1.01 (0.92, 1.10)                       | 0.86     |
| model 3                                         | Ref.                              | -        | 0.91 (0.70, 1.19) | 0.50     | 0.83 (0.63, 1.08) | 0.17     | 0.96 (0.73, 1.27) | 0.78     | 1.00 (0.74, 1.36) | 0.98     | 0.82               | 1.05 (0.95, 1.16)                       | 0.39     |
| Dietary pattern 3: meat-based diet              |                                   |          |                   |          |                   |          |                   |          |                   |          |                    |                                         |          |
| model 1                                         | Ref.                              | -        | 1.06 (0.83, 1.37) | 0.64     | 1.17 (0.91, 1.51) | 0.21     | 1.04 (0.80, 1.35) | 0.76     | 1.34 (1.03, 1.73) | 0.03     | 0.04               | 1.09 (1.01, 1.18)                       | 0.03     |
| model 2                                         | Ref.                              | -        | 0.97 (0.74, 1.26) | 0.79     | 1.13 (0.86, 1.47) | 0.39     | 0.96 (0.72, 1.27) | 0.76     | 1.38 (1.00, 1.89) | 0.05     | 0.06               | 1.12 (1.01, 1.25)                       | 0.04     |
| model 3                                         | Ref.                              | -        | 1.01 (0.77, 1.33) | 0.94     | 1.19 (0.89, 1.58) | 0.23     | 1.01 (0.74, 1.38) | 0.94     | 1.52 (1.05, 2.20) | 0.03     | 0.04               | 1.18 (1.03, 1.36)                       | 0.02     |
| Dietary pattern 4: soup/seafood/eggs diet       |                                   |          |                   |          |                   |          |                   |          |                   |          |                    |                                         |          |
| model 1                                         | Ref.                              | -        | 0.94 (0.73, 1.20) | 0.61     | 1.02 (0.80, 1.31) | 0.85     | 1.06 (0.83, 1.35) | 0.66     | 0.97 (0.76, 1.24) | 0.81     | 0.92               | 0.99 (0.92, 1.07)                       | 0.80     |
| model 2                                         | Ref.                              | -        | 0.94 (0.73, 1.23) | 0.67     | 1.02 (0.79, 1.33) | 0.86     | 1.05 (0.81, 1.36) | 0.74     | 0.96 (0.73, 1.25) | 0.74     | 0.94               | 0.98 (0.90, 1.07)                       | 0.67     |
| model 3                                         | Ref.                              | -        | 0.97 (0.74, 1.26) | 0.80     | 1.04 (0.80, 1.35) | 0.78     | 1.08 (0.82, 1.40) | 0.59     | 0.98 (0.75, 1.29) | 0.90     | 0.90               | 0.99 (0.91, 1.08)                       | 0.85     |
| Dietary pattern 5: vegetarian diet              |                                   |          |                   |          |                   |          |                   |          |                   |          |                    |                                         |          |
| model 1                                         | Ref.                              | -        | 0.96 (0.75, 1.23) | 0.75     | 1.00 (0.78, 1.27) | 0.98     | 0.93 (0.72, 1.19) | 0.55     | 0.90 (0.70, 1.15) | 0.40     | 0.37               | 0.91 (0.84, 0.99)                       | 0.03     |
| model 2                                         | Ref.                              | -        | 0.99 (0.77, 1.29) | 0.96     | 1.06 (0.82, 1.38) | 0.66     | 0.97 (0.74, 1.27) | 0.82     | 0.85 (0.63, 1.13) | 0.25     | 0.24               | 0.88 (0.80, 0.97)                       | 0.009    |
| model 3                                         | Ref.                              | -        | 1.04 (0.80, 1.36) | 0.77     | 1.12 (0.85, 1.47) | 0.42     | 1.05 (0.79, 1.39) | 0.75     | 0.97 (0.70, 1.34) | 0.86     | 0.82               | 0.91 (0.82, 1.02)                       | 0.11     |
| Dietary pattern 6: mushrooms/animal organs diet |                                   |          |                   |          |                   |          |                   |          |                   |          |                    |                                         |          |
| model 1                                         | Ref.                              | -        | 0.97 (0.75, 1.25) | 0.78     | 1.08 (0.84, 1.39) | 0.57     | 1.46 (1.15, 1.87) | 0.002    | 1.16 (0.90, 1.49) | 0.25     | 0.04               | 1.08 (1.00, 1.16)                       | 0.04     |
| model 2                                         | Ref.                              | -        | 1.00 (0.76, 1.31) | 0.99     | 1.13 (0.86, 1.48) | 0.39     | 1.53 (1.18, 1.98) | 0.001    | 1.21 (0.93, 1.57) | 0.16     | 0.03               | 1.10 (1.01, 1.19)                       | 0.03     |
| model 3                                         | Ref.                              | -        | 1.00 (0.76, 1.32) | 0.99     | 1.15 (0.87, 1.51) | 0.33     | 1.54 (1.18, 2.01) | 0.002    | 1.22 (0.93, 1.60) | 0.16     | 0.03               | 1.10 (1.01, 1.20)                       | 0.02     |

OR, odds ratio; CI, confidence interval; Ref., reference; the EMSNGS, the Evaluation and Monitoring on School-based Nutrition and Growth in Shenzhen.

Model 1: adjust for sex and age;

Model 2: adjust for model 1 + geographic region, family income, maternal education, family history of hyperuricemia or gout, physical activity, overweight or obesity, puberty status, total energy intake

Model 3: adjust for model 2 + each other dietary pattern score (quintiles)

ESI Table 4. Association between meat-based diet, food compositions and serum uric acid concentrations in the EMSNGS study (n=3,383).

|                                                        | Quintile of Dietary Pattern Score |   |                     |      |                     |      |                      |      |                      |       | p for trend | per SD increased dietary pattern scores |       |
|--------------------------------------------------------|-----------------------------------|---|---------------------|------|---------------------|------|----------------------|------|----------------------|-------|-------------|-----------------------------------------|-------|
|                                                        | Q1                                |   | Q2                  |      | Q3                  |      | Q4                   |      | Q5                   |       |             | β (95% CI)                              | P     |
|                                                        | β (95% CI)                        | P | β (95% CI)          | P    | β (95% CI)          | P    | β (95% CI)           | P    | β (95% CI)           | P     |             |                                         |       |
| Adjusted model                                         | Ref.                              | - | -1.30 (-9.35, 6.75) | 0.75 | 5.60 (-2.98, 14.19) | 0.20 | -0.25 (-9.57, 9.08)  | 0.96 | 14.36 (2.58, 26.13)  | 0.02  | 0.03        | 4.89 (0.60, 9.18)                       | 0.03  |
| Adjusted model + total protein (En%)                   | Ref.                              | - | -0.66 (-8.81, 7.49) | 0.87 | 6.74 (-2.14, 15.62) | 0.14 | 1.70 (-8.40, 11.79)  | 0.74 | 17.16 (4.09, 30.23)  | 0.01  | 0.01        | 6.70 (1.69, 11.70)                      | 0.009 |
| Adjusted model + animal protein (En%)                  | Ref.                              | - | -0.44 (-8.64, 7.76) | 0.92 | 7.09 (-1.93, 16.10) | 0.12 | 2.17 (-8.17, 12.51)  | 0.68 | 17.94 (4.39, 31.49)  | 0.009 | 0.01        | 7.19 (1.93, 12.45)                      | 0.007 |
| Adjusted model + vegetable protein (En%)               | Ref.                              | - | -0.95 (-9.08, 7.18) | 0.82 | 6.18 (-2.62, 14.98) | 0.17 | 0.61 (-9.14, 10.37)  | 0.90 | 15.70 (3.10, 28.30)  | 0.02  | 0.02        | 5.64 (0.94, 10.34)                      | 0.02  |
| Adjusted model + total fat (En%)                       | Ref.                              | - | -0.95 (-9.03, 7.13) | 0.82 | 6.26 (-2.43, 14.95) | 0.16 | 0.75 (-8.79, 10.29)  | 0.88 | 15.73 (3.62, 27.83)  | 0.01  | 0.02        | 5.63 (1.16, 10.10)                      | 0.01  |
| Adjusted model + animal fat (En%)                      | Ref.                              | - | -0.78 (-8.94, 7.37) | 0.85 | 6.49 (-2.39, 15.37) | 0.15 | 1.20 (-8.82, 11.22)  | 0.81 | 16.52 (3.52, 29.53)  | 0.01  | 0.02        | 6.21 (1.28, 11.15)                      | 0.01  |
| Adjusted model +vegetable fat (En%)                    | Ref.                              | - | -1.40 (-9.46, 6.65) | 0.73 | 5.48 (-3.12, 14.07) | 0.21 | -0.51 (-9.88, 8.86)  | 0.92 | 13.87 (1.97, 25.77)  | 0.02  | 0.03        | 4.71 (0.36, 9.05)                       | 0.03  |
| Adjusted model + total carbohydrate (En%)              | Ref.                              | - | -0.81 (-8.92, 7.30) | 0.85 | 6.50 (-2.26, 15.27) | 0.15 | 1.17 (-8.55, 10.89)  | 0.81 | 16.34 (3.93, 28.75)  | 0.01  | 0.01        | 6.03 (1.39, 10.66)                      | 0.01  |
| Adjusted model + total dietary fiber (g/d)             | Ref.                              | - | -1.44 (-9.57, 6.69) | 0.73 | 5.38 (-3.41, 14.17) | 0.23 | -0.57 (-10.31, 9.16) | 0.91 | 13.81 (1.18, 26.44)  | 0.03  | 0.05        | 4.98 (0.10, 9.87)                       | 0.05  |
| Adjusted model + total cholesterol (g/d)               | Ref.                              | - | -1.10 (-9.16, 6.95) | 0.79 | 5.89 (-2.71, 14.50) | 0.18 | 0.27 (-9.13, 9.66)   | 0.96 | 15.16 (3.25, 27.07)  | 0.01  | 0.02        | 5.42 (1.02, 9.81)                       | 0.02  |
| Adjusted model + total purines (mg/d)                  | Ref.                              | - | -1.57 (-9.63, 6.49) | 0.70 | 5.08 (-3.56, 13.71) | 0.25 | -1.27 (-10.75, 8.21) | 0.79 | 12.22 (-0.10, 24.55) | 0.05  | 0.08        | 3.88 (-0.86, 8.63)                      | 0.11  |
| Adjusted model + guanine (mg/d)                        | Ref.                              | - | -1.30 (-9.35, 6.75) | 0.75 | 5.64 (-2.95, 14.23) | 0.20 | -0.35 (-9.67, 8.98)  | 0.94 | 13.94 (2.15, 25.73)  | 0.02  | 0.03        | 4.66 (0.35, 8.97)                       | 0.03  |
| Adjusted model + adenine (mg/d)                        | Ref.                              | - | -1.15 (-9.19, 6.90) | 0.78 | 5.88 (-2.71, 14.46) | 0.18 | 0.01 (-9.31, 9.34)   | 1.00 | 14.51 (2.73, 26.28)  | 0.02  | 0.02        | 4.89 (0.60, 9.19)                       | 0.03  |
| Adjusted model + hypoxanthine (mg/d)                   | Ref.                              | - | -1.47 (-9.55, 6.62) | 0.72 | 5.26 (-3.47, 13.99) | 0.24 | -0.87 (-10.61, 8.87) | 0.86 | 13.12 (0.09, 26.15)  | 0.05  | 0.09        | 4.61 (-0.74, 9.95)                      | 0.09  |
| Adjusted model + xanthine (mg/d)                       | Ref.                              | - | -1.10 (-9.18, 6.98) | 0.79 | 5.84 (-2.79, 14.47) | 0.19 | 0.00 (-9.36, 9.37)   | 1.00 | 14.73 (2.88, 26.58)  | 0.02  | 0.02        | 5.15 (0.80, 9.49)                       | 0.02  |
| Adjusted model + (total purines - hypoxanthine) (mg/d) | Ref.                              | - | -1.32 (-9.36, 6.74) | 0.75 | 5.64 (-2.94, 14.23) | 0.20 | -0.30 (-9.62, 9.03)  | 0.95 | 14.04 (2.26, 25.82)  | 0.02  | 0.03        | 4.69 (0.39, 8.99)                       | 0.03  |

CI, confidence interval; Ref., reference; the EMSNGS, the Evaluation and Monitoring on School-based Nutrition and Growth in Shenzhen.

Adjust for sex, age, geographic region, family income, maternal education, family history of hyperuricemia or gout, physical activity, overweight or obesity, puberty status, total energy intake and each other dietary pattern score (quintiles).

ESI Table 5. Factor-Matrix loadings for the five major dietary patterns identified by principal component analysis using varimax rotation after removing high hypoxanthine food groups

|                                 | Pattern 1 | Pattern 2 | Pattern 3 | Pattern 4 | Pattern 5 |
|---------------------------------|-----------|-----------|-----------|-----------|-----------|
| Fried food (g/d)                | 0.717     |           |           |           |           |
| Snack foods (g/d)               | 0.695     |           |           |           |           |
| Drinks (g/d)                    | 0.648     |           |           |           |           |
| whole grains and pulses (g/d)   |           | 0.637     |           |           |           |
| Fruits (g/d)                    |           | 0.587     |           |           |           |
| Vegetable (g/d)                 |           | 0.469     |           |           |           |
| Refined grain (g/d)             |           |           | 0.724     |           |           |
| Soybeans and soy products (g/d) |           |           | 0.506     |           |           |
| Eggs (g/d)                      |           |           | 0.427     |           |           |
| Animal organs and blood (g/d)   |           |           |           | 0.701     |           |
| Mushrooms (g/d)                 |           |           |           | 0.667     |           |
| Nut (g/d)                       |           |           |           |           | 0.561     |
| Tubers (g/d)                    |           | 0.455     |           |           | -0.551    |
| Dairy (g/d)                     |           |           | 0.361     |           | 0.461     |

Factor loads above 0.35 are shown. The value of Kaiser-Meyer-Olkin measure of sampling adequacy is 0.685. P for Bartlett's Test of Sphericity < 0.001. Five factors explained 47.44% of the variance.

ESI Table 6. The association between five dietary patterns without hypoxanthine-rich food groups and serum uric acid concentrations in the EMSNGS study (n=3,383)

|                   | Quintile of Dietary Pattern Score |          |                       |          |                      |          |                      |          |                       |          | <i>p</i> for trend | per SD increased dietary pattern scores |          |
|-------------------|-----------------------------------|----------|-----------------------|----------|----------------------|----------|----------------------|----------|-----------------------|----------|--------------------|-----------------------------------------|----------|
|                   | Q1                                |          | Q2                    |          | Q3                   |          | Q4                   |          | Q5                    |          |                    | <i>β</i> (95% CI)                       | <i>P</i> |
|                   | <i>β</i> (95% CI)                 | <i>P</i> | <i>β</i> (95% CI)     | <i>P</i> | <i>β</i> (95% CI)    | <i>P</i> | <i>β</i> (95% CI)    | <i>P</i> | <i>β</i> (95% CI)     | <i>P</i> |                    |                                         |          |
| Dietary pattern 1 | Ref.                              | -        | -8.81 (-16.91, -0.70) | 0.03     | -7.00 (-15.19, 1.20) | 0.09     | -4.38 (-12.72, 3.97) | 0.30     | -0.53 (-9.37, 8.31)   | 0.91     | 0.51               | 0.62 (-2.33, 3.57)                      | 0.68     |
| Dietary pattern 2 | Ref.                              | -        | -1.62 (-10.14, 6.90)  | 0.71     | -3.51 (-12.04, 5.02) | 0.42     | -6.08 (-14.78, 2.62) | 0.17     | -9.22 (-18.42, -0.01) | 0.05     | 0.03               | -3.76 (-6.75, -0.77)                    | 0.01     |
| Dietary pattern 3 | Ref.                              | -        | 3.44 (-4.62, 11.50)   | 0.40     | 2.41 (-5.93, 10.75)  | 0.57     | -2.56 (-11.51, 6.40) | 0.58     | 0.06 (-10.68, 10.80)  | 0.99     | 0.68               | -1.07 (-4.79, 2.66)                     | 0.57     |
| Dietary pattern 4 | Ref.                              | -        | 2.64 (-5.63, 10.91)   | 0.53     | 5.74 (-2.62, 14.10)  | 0.18     | 3.60 (-4.92, 12.13)  | 0.41     | 7.12 (-1.61, 15.85)   | 0.11     | 0.13               | 2.76 (-0.13, 5.64)                      | 0.06     |
| Dietary pattern 5 | Ref.                              | -        | -2.60 (-10.96, 5.75)  | 0.54     | 2.50 (-5.96, 10.95)  | 0.56     | 3.67 (-4.73, 12.06)  | 0.39     | 7.68 (-0.89, 16.26)   | 0.08     | 0.04               | 2.94 (0.19, 5.70)                       | 0.04     |

CI, confidence interval; Ref., reference; the EMSNGS, the Evaluation and Monitoring on School-based Nutrition and Growth in Shenzhen.

Adjust for sex, age, geographic region, family income, maternal education, family history of hyperuricemia or gout, physical activity, overweight or obesity, puberty status, total energy intake and each other dietary pattern score (quintiles).

ESI Table 7. The Pearson correlation coefficient between the scores of dietary pattern 5 (without hypoxanthine-rich food groups) and the scores of six dietary patterns (with all food groups)

|   | ultra-processed diet | plant-based nutritious diet | meat-based diet | soup/seafood/eggs diet | vegetarian diet | mushrooms/animal organs diet |
|---|----------------------|-----------------------------|-----------------|------------------------|-----------------|------------------------------|
| r | 0.083                | 0.656                       | 0.180           | 0.016                  | -0.598          | -0.044                       |
| P | <0.001               | <0.001                      | <0.001          | 0.34                   | <0.001          | 0.011                        |

ESI Table 8. Sensitivity analysis of the association between the z-scores of serum uric acid and meat-based diet in the EMSNGS study (n=3,383)

|                   | Quintile of Dietary Pattern Score |          |                     |          |                     |          |                     |          |                     |          | per SD increased dietary pattern scores |                     |          |
|-------------------|-----------------------------------|----------|---------------------|----------|---------------------|----------|---------------------|----------|---------------------|----------|-----------------------------------------|---------------------|----------|
|                   | Q1                                |          | Q2                  |          | Q3                  |          | Q4                  |          | Q5                  |          | <i>p</i> for trend                      | $\beta$ (95% CI)    | <i>P</i> |
|                   | $\beta$ (95% CI)                  | <i>P</i> | $\beta$ (95% CI)    | <i>P</i> | $\beta$ (95% CI)    | <i>P</i> | $\beta$ (95% CI)    | <i>P</i> | $\beta$ (95% CI)    | <i>P</i> |                                         |                     |          |
| Dietary pattern 1 | Ref.                              | -        | -0.04 (-0.14, 0.06) | 0.42     | 0.01 (-0.09, 0.12)  | 0.80     | 0.05 (-0.06, 0.15)  | 0.38     | 0.02 (-0.10, 0.13)  | 0.78     | 0.43                                    | 0.02 (-0.02, 0.06)  | 0.26     |
| Dietary pattern 2 | Ref.                              | -        | -0.04 (-0.15, 0.06) | 0.40     | -0.05 (-0.15, 0.06) | 0.36     | -0.08 (-0.18, 0.03) | 0.15     | -0.03 (-0.15, 0.09) | 0.63     | 0.59                                    | -0.01 (-0.05, 0.03) | 0.64     |
| Dietary pattern 3 | Ref.                              | -        | -0.01 (-0.11, 0.10) | 0.91     | 0.08 (-0.02, 0.19)  | 0.13     | 0.02 (-0.10, 0.13)  | 0.77     | 0.15 (0.01, 0.29)   | 0.04     | 0.05                                    | 0.05 (-0.01, 0.10)  | 0.08     |
| Dietary pattern 4 | Ref.                              | -        | -0.03 (-0.14, 0.07) | 0.51     | 0.00 (-0.10, 0.10)  | 0.97     | -0.01 (-0.11, 0.10) | 0.92     | 0.03 (-0.07, 0.14)  | 0.55     | 0.42                                    | 0.01 (-0.03, 0.04)  | 0.71     |
| Dietary pattern 5 | Ref.                              | -        | 0.04 (-0.06, 0.14)  | 0.47     | -0.01 (-0.12, 0.09) | 0.83     | -0.03 (-0.14, 0.08) | 0.58     | -0.09 (-0.21, 0.03) | 0.16     | 0.08                                    | -0.04 (-0.08, 0.01) | 0.10     |
| Dietary pattern 6 | Ref.                              | -        | -0.01 (-0.12, 0.09) | 0.80     | 0.05 (-0.05, 0.15)  | 0.34     | 0.08 (-0.03, 0.18)  | 0.15     | 0.07 (-0.04, 0.17)  | 0.21     | 0.09                                    | 0.03 (-0.01, 0.06)  | 0.07     |

CI, confidence interval; Ref., reference; the EMSNGS, the Evaluation and Monitoring on School-based Nutrition and Growth in Shenzhen.

Adjust for sex, age, geographic region, family income, maternal education, family history of hyperuricemia or gout, physical activity, overweight or obesity, puberty status, total energy intake and each other dietary pattern score (quintiles).

ESI Table 9. Sensitivity analysis of the association between serum uric acid and meat-based diet after excluding participants with missing covariates in the EMSNGS study (n=3,302)

|                   | Quintile of Dietary Pattern Score |          |                      |          |                      |          |                      |          |                      |          | per SD increased dietary pattern |                     |          |
|-------------------|-----------------------------------|----------|----------------------|----------|----------------------|----------|----------------------|----------|----------------------|----------|----------------------------------|---------------------|----------|
|                   | Q1                                |          | Q2                   |          | Q3                   |          | Q4                   |          | Q5                   |          | <i>P</i> for trend               | scores              |          |
|                   | $\beta$ (95% CI)                  | <i>P</i> | $\beta$ (95% CI)     | <i>P</i> | $\beta$ (95% CI)     | <i>P</i> | $\beta$ (95% CI)     | <i>P</i> | $\beta$ (95% CI)     | <i>P</i> |                                  | $\beta$ (95% CI)    | <i>P</i> |
| Dietary pattern 1 | Ref.                              | -        | -3.36 (-11.48, 4.77) | 0.42     | 2.15 (-6.18, 10.48)  | 0.61     | 4.75 (-3.73, 13.23)  | 0.27     | 3.84 (-5.41, 13.09)  | 0.42     | 0.17                             | 1.99 (-1.20, 5.17)  | 0.22     |
| Dietary pattern 2 | Ref.                              | -        | -2.84 (-11.29, 5.60) | 0.51     | -3.01 (-11.52, 5.51) | 0.49     | -3.23 (-12.00, 5.54) | 0.47     | -0.20 (-9.81, 9.41)  | 0.97     | 0.96                             | 0.49 (-2.73, 3.72)  | 0.77     |
| Dietary pattern 3 | Ref.                              | -        | -2.84 (-10.95, 5.28) | 0.49     | 4.36 (-4.34, 13.06)  | 0.33     | -1.82 (-11.27, 7.64) | 0.71     | 11.47 (-0.47, 23.42) | 0.06     | 0.08                             | 4.59 (0.23, 8.96)   | 0.04     |
| Dietary pattern 4 | Ref.                              | -        | -4.54 (-12.86, 3.78) | 0.29     | -2.67 (-10.99, 5.66) | 0.53     | -2.88 (-11.22, 5.45) | 0.50     | -2.65 (-11.28, 5.99) | 0.55     | 0.73                             | -1.19 (-3.97, 1.59) | 0.40     |
| Dietary pattern 5 | Ref.                              | -        | 3.81 (-4.42, 12.05)  | 0.36     | 0.45 (-8.02, 8.93)   | 0.92     | -3.26 (-12.10, 5.59) | 0.47     | -6.83 (-16.93, 3.28) | 0.19     | 0.08                             | -2.80 (-6.24, 0.63) | 0.11     |
| Dietary pattern 6 | Ref.                              | -        | -0.99 (-9.33, 7.35)  | 0.82     | 2.83 (-5.68, 11.34)  | 0.52     | 7.15 (-1.31, 15.62)  | 0.10     | 3.12 (-5.34, 11.59)  | 0.47     | 0.22                             | 2.19 (-0.62, 5.00)  | 0.13     |

Adjust for sex, age, geographic region, family income, maternal education, family history of hyperuricemia or gout, physical activity, overweight or obesity, puberty status, total energy intake and each other dietary pattern score (quintiles).
